# Supplementary material for: A novel mutation of the CLCN1 gene in a cat with myotonia congenita: Diagnosis and treatment
Source: PubMed Central journal article supplement (PMC9308434; doi:10.1111/jvim.16471), 2022-07-11
Supplement: JVIM-36-1454-s006.pdf [file JVIM-36-1454-s006.pdf]

| Position (felCat9.0) | Ref                                                                                                                                                                                                                                                                              | Alt                                                              | Gene Symbol       | ENSEMBL Gene ID                         | ENSEMBL Transcript ID | Variant Type                                                               | Effect   |
|----------------------|----------------------------------------------------------------------------------------------------------------------------------------------------------------------------------------------------------------------------------------------------------------------------------|------------------------------------------------------------------|-------------------|-----------------------------------------|-----------------------|----------------------------------------------------------------------------|----------|
| A1:10292960          | AC                                                                                                                                                                                                                                                                               | A                                                                | n/a               | ENSFAG00000031325                       | ENSFCAT00000027051    | frameshift variant                                                         | HIGH     |
| A1:83744719          | C                                                                                                                                                                                                                                                                                | A                                                                | n/a               | ENSFAG00000044316                       | ENSFCAT00000050411    | stop gained                                                                | HIGH     |
| A1:86845101          | CTTTG                                                                                                                                                                                                                                                                            | C                                                                | n/a               | ENSFAG00000035456                       | ENSFCAT00000049036    | frameshift variant                                                         | HIGH     |
| A2:73126183          | C                                                                                                                                                                                                                                                                                | T                                                                | n/a               | ENSFAG00000045328                       | ENSFCAT00000050264    | splice acceptor variant & non coding transcript variant                    | HIGH     |
| A2:158967084         | CTTCAGGT                                                                                                                                                                                                                                                                         | C                                                                | CLCN1             | ENSFAG00000007278                       | ENSFCAT00000007280    | splice donor variant & coding sequence variant                             | HIGH     |
|                      |                                                                                                                                                                                                                                                                                  |                                                                  |                   |                                         | ENSFCAT00000041228    | splice donor variant & coding sequence variant                             | HIGH     |
| A3:24651557          | AGC                                                                                                                                                                                                                                                                              | A                                                                | NCOA6             | ENSFAG00000002306                       | ENSFCAT00000002306    | frameshift variant                                                         | HIGH     |
|                      |                                                                                                                                                                                                                                                                                  |                                                                  |                   |                                         | ENSFCAT00000062029    | frameshift variant                                                         | HIGH     |
|                      |                                                                                                                                                                                                                                                                                  |                                                                  |                   |                                         | ENSFCAT00000065640    | frameshift variant                                                         | HIGH     |
| A3:92580969          | C                                                                                                                                                                                                                                                                                | T                                                                | DUSP11<br>C2orf78 | ENSFAG00000019224<br>ENSFAG000000026552 | ENSFCAT00000019207    | stop gained                                                                | HIGH     |
|                      |                                                                                                                                                                                                                                                                                  |                                                                  |                   |                                         | ENSFCAT00000028153    | upstream gene variant                                                      | MODIFIER |
| A3:93084265          | CTG                                                                                                                                                                                                                                                                              | C                                                                | n/a               | ENSFAG00000008616                       | ENSFCAT00000008621    | splice acceptor variant & intron variant                                   | HIGH     |
|                      |                                                                                                                                                                                                                                                                                  |                                                                  |                   |                                         | ENSFCAT00000046912    | splice acceptor variant & intron variant                                   | HIGH     |
|                      |                                                                                                                                                                                                                                                                                  |                                                                  |                   |                                         | ENSFCAT00000047760    | splice acceptor variant & intron variant                                   | HIGH     |
|                      |                                                                                                                                                                                                                                                                                  |                                                                  |                   |                                         | ENSFCAT00000052808    | splice acceptor variant & intron variant                                   | HIGH     |
| B1:125723765         | C                                                                                                                                                                                                                                                                                | T                                                                | STPG2             | ENSFAG00000040357                       | ENSFCAT00000050738    | stop gained                                                                | HIGH     |
| B1:187565548         | GA                                                                                                                                                                                                                                                                               | G                                                                | ZCHC4             | ENSFAG00000023396                       | ENSFCAT00000031715    | frameshift variant                                                         | HIGH     |
| B4:96602070          | T                                                                                                                                                                                                                                                                                | TG                                                               | RAB3IP            | ENSFAG00000015554                       | ENSFCAT00000015559    | intron variant                                                             | MODIFIER |
|                      |                                                                                                                                                                                                                                                                                  |                                                                  | n/a               | ENSFAG00000046521                       | ENSFCAT00000058555    | frameshift variant                                                         | HIGH     |
| B4:121638249         | AGG                                                                                                                                                                                                                                                                              | A                                                                | RF00563           | ENSFAG00000029370                       | ENSFCAT00000024452    | upstream gene variant                                                      | MODIFIER |
|                      |                                                                                                                                                                                                                                                                                  |                                                                  | SLC25A3           | ENSFAG00000025087                       | ENSFCAT00000025087    | frameshift variant                                                         | HIGH     |
|                      |                                                                                                                                                                                                                                                                                  |                                                                  |                   | ENSFAG00000033040                       | ENSFCAT00000033040    | frameshift variant                                                         | HIGH     |
|                      |                                                                                                                                                                                                                                                                                  |                                                                  |                   | ENSFAG00000062282                       | ENSFCAT00000062282    | frameshift variant                                                         | HIGH     |
| B4:121638253         | A                                                                                                                                                                                                                                                                                | ATT                                                              | RF00563           | ENSFAG00000029370                       | ENSFCAT00000024452    | upstream gene variant                                                      | MODIFIER |
|                      |                                                                                                                                                                                                                                                                                  |                                                                  | SLC25A3           | ENSFAG00000025087                       | ENSFCAT00000025087    | frameshift variant                                                         | HIGH     |
|                      |                                                                                                                                                                                                                                                                                  |                                                                  |                   | ENSFAG00000033040                       | ENSFCAT00000033040    | frameshift variant                                                         | HIGH     |
|                      |                                                                                                                                                                                                                                                                                  |                                                                  |                   | ENSFAG00000062282                       | ENSFCAT00000062282    | frameshift variant                                                         | HIGH     |
| B4:127520915         | T                                                                                                                                                                                                                                                                                | C                                                                | n/a               | ENSFAG00000036585                       | ENSFCAT00000043931    | intron variant                                                             | MODIFIER |
|                      |                                                                                                                                                                                                                                                                                  |                                                                  |                   |                                         | ENSFCAT00000058001    | start lost                                                                 | HIGH     |
| C1:12054155          | C                                                                                                                                                                                                                                                                                | T                                                                | n/a               | ENSFAG00000044602                       | ENSFCAT00000042892    | splice donor variant                                                       | HIGH     |
| C1:106226700         | GGA                                                                                                                                                                                                                                                                              | G                                                                | SEMA6C            | ENSFAG00000005557                       | ENSFCAT00000005559    | frameshift variant                                                         | HIGH     |
|                      |                                                                                                                                                                                                                                                                                  |                                                                  |                   |                                         | ENSFCAT00000043019    | frameshift variant                                                         | HIGH     |
|                      |                                                                                                                                                                                                                                                                                  |                                                                  |                   |                                         | ENSFCAT00000053872    | 3 prime UTR variant                                                        | MODIFIER |
|                      |                                                                                                                                                                                                                                                                                  |                                                                  |                   |                                         | ENSFCAT00000060036    | downstream gene variant                                                    | MODIFIER |
|                      |                                                                                                                                                                                                                                                                                  |                                                                  |                   |                                         | ENSFCAT00000065994    | 3 prime UTR variant                                                        | MODIFIER |
|                      |                                                                                                                                                                                                                                                                                  |                                                                  |                   |                                         | ENSFCAT00000057479    | start lost                                                                 | HIGH     |
| C1:107022276         | C                                                                                                                                                                                                                                                                                | T                                                                | n/a               | ENSFAG00000041899                       | ENSFCAT00000008221    | frameshift variant                                                         | HIGH     |
|                      |                                                                                                                                                                                                                                                                                  |                                                                  |                   |                                         | ENSFCAT00000024736    | intron variant                                                             | MODIFIER |
|                      |                                                                                                                                                                                                                                                                                  |                                                                  |                   |                                         | ENSFCAT00000038569    | intron variant                                                             | MODIFIER |
|                      |                                                                                                                                                                                                                                                                                  |                                                                  |                   |                                         | ENSFCAT00000061772    | frameshift variant                                                         | HIGH     |
| C1:194039351         | CTT                                                                                                                                                                                                                                                                              | C                                                                | CREB1             | ENSFAG00000008220                       | ENSFCAT000000031236   | frameshift variant                                                         | HIGH     |
|                      |                                                                                                                                                                                                                                                                                  |                                                                  |                   |                                         | ENSFCAT00000001167    | stop gained                                                                | HIGH     |
|                      |                                                                                                                                                                                                                                                                                  |                                                                  |                   |                                         | ENSFCAT00000001168    | upstream gene variant                                                      | MODIFIER |
| D1:16618864          | C                                                                                                                                                                                                                                                                                | T                                                                | NLRX1             | ENSFAG00000001167                       | ENSFCAT00000001167    | stop gained                                                                | HIGH     |
|                      |                                                                                                                                                                                                                                                                                  |                                                                  | PDZD3             | ENSFAG00000001168                       | ENSFCAT000000037361   | upstream gene variant                                                      | MODIFIER |
|                      |                                                                                                                                                                                                                                                                                  |                                                                  | NLRX1             | ENSFAG00000001167                       | ENSFCAT00000043500    | stop gained                                                                | HIGH     |
| D2:33115866          | A                                                                                                                                                                                                                                                                                | AGCTG                                                            | TYSND1            | ENSFAG00000044166                       | ENSFCAT00000060677    | downstream gene variant                                                    | MODIFIER |
|                      |                                                                                                                                                                                                                                                                                  |                                                                  |                   |                                         | ENSFCAT00000062792    | frameshift variant                                                         | HIGH     |
| D2:59476548          | G                                                                                                                                                                                                                                                                                | GTGGGTGACAGGAGCTG<br>GGATGGAGGCTCTGCCA<br>CCAGGCCCTGTCTCAAT<br>C | PYROXD2           | ENSFAG00000009346                       | ENSFCAT00000009349    | frameshift variant                                                         | HIGH     |
| E1:9602491           | T                                                                                                                                                                                                                                                                                | TC                                                               | n/a               | ENSFAG000000031027                      | ENSFCAT00000028891    | intron variant                                                             | MODIFIER |
|                      |                                                                                                                                                                                                                                                                                  |                                                                  | PIGL              | ENSFAG00000010824                       | ENSFCAT00000065686    | frameshift variant                                                         | HIGH     |
| E1:38746457          | CG                                                                                                                                                                                                                                                                               | C                                                                | HOXB3             | ENSFAG00000006408                       | ENSFCAT00000006410    | upstream gene variant                                                      | MODIFIER |
|                      |                                                                                                                                                                                                                                                                                  |                                                                  | MIR10A            | ENSFAG00000016475                       | ENSFCAT00000016479    | downstream gene variant                                                    | MODIFIER |
|                      |                                                                                                                                                                                                                                                                                  |                                                                  | HOXB4             | ENSFAG00000041872                       | ENSFCAT00000062069    | frameshift variant                                                         | HIGH     |
|                      |                                                                                                                                                                                                                                                                                  |                                                                  | GPR179            | ENSFAG00000005812                       | ENSFCAT00000005815    | stop gained                                                                | HIGH     |
| E1:51024511          | AGGGGCGCTGGGTGGCGCAGTC<br>GGTTAAGCGTCCGATTCAGCCAG<br>GTCACGATCTCGCGTCCGTGAGT<br>TTGAGCCCCGCTGGGCTCTGG<br>GCTGATGGCTCAGAGCTGGAGC<br>CTGTTTCTGATTCTGTCTCCCTC<br>TCTCTGCCCCCTCCCCGTTCTATG<br>CTCTGCTCTCTCTGCCAAAAAT<br>AAATAAATGTTAAAAAAAATTT<br>AAAAAAAAAAAAAAAAAAGAA<br>ATTCTAAGC | A                                                                | n/a               | ENSFAG00000042903                       | ENSFCAT00000053189    | splice donor variant & non coding transcript exon variant & intron variant | HIGH     |
| E2:13446733          | T                                                                                                                                                                                                                                                                                | C                                                                | LIPE              | ENSFAG000000022678                      | ENSFCAT00000026802    | stop lost                                                                  | HIGH     |
|                      |                                                                                                                                                                                                                                                                                  |                                                                  | n/a               | ENSFAG000000037892                      | ENSFCAT00000045735    | intron variant                                                             | MODIFIER |
| E2:61620435          | T                                                                                                                                                                                                                                                                                | A                                                                | n/a               | ENSFAG00000044866                       | ENSFCAT00000050297    | upstream gene variant                                                      | MODIFIER |

|             |   |   |       |                    |                     |                                                         |          |
|-------------|---|---|-------|--------------------|---------------------|---------------------------------------------------------|----------|
|             |   |   |       |                    | ENSFECAT00000052013 | splice acceptor variant & non coding transcript variant | HIGH     |
|             |   |   |       |                    | ENSFECAT00000055872 | splice acceptor variant & non coding transcript variant | HIGH     |
| F1:70503299 | C | G | DCST1 | ENSFCAG00000018847 | ENSFECAT00000018172 | start lost                                              | HIGH     |
|             |   |   |       |                    | ENSFECAT00000058210 | start lost                                              | HIGH     |
|             |   |   | DCST2 | ENSFCAG00000040157 | ENSFECAT00000053006 | intron variant                                          | MODIFIER |

Table 1. A list of variants unique to the proband that were called high impact by VEP and the effect in all associated transcripts.

| Position (felCat9.0) | Ref  | Alt | Gene Symbol | ENSEMBL Gene ID     | ENSEMBL Transcript ID | Variant Type                             | Effect   |
|----------------------|------|-----|-------------|---------------------|-----------------------|------------------------------------------|----------|
| A1:71234391          | A    | G   | CLYBL       | ENSCFCAG00000031043 | ENSCFCAT00000034646   | missense variant                         | MODERATE |
| A1:84177713          | C    | T   | n/a         | ENSCFCAG00000022087 | ENSCFCAT00000050511   | intron variant                           | MODIFIER |
| A1:91378473          | T    | A   | BTNL9       | ENSCFCAG00000000991 | ENSCFCAT00000002092   | missense variant                         | MODERATE |
| A1:111919100         | G    | A   | SHROOM1     | ENSCFCAG00000022651 | ENSCFCAT00000000991   | missense variant                         | MODERATE |
| A1:113672271         | G    | T   | CAMLG       | ENSCFCAG00000026813 | ENSCFCAT00000034165   | missense variant                         | MODERATE |
| A1:116898026         | C    | T   | CDC25C      | ENSCFCAG00000031992 | ENSCFCAT00000054663   | missense variant                         | MODERATE |
| A1:151761784         | G    | A   | n/a         | ENSCFCAG00000022528 | ENSCFCAT00000022809   | missense variant                         | MODERATE |
| A1:151762007         | C    | G   | n/a         | ENSCFCAG00000022528 | ENSCFCAT00000034960   | missense variant                         | MODERATE |
| A1:159686340         | ATCT | A   | TTC37       | ENSCFCAG00000010817 | ENSCFCAT00000022858   | missense variant                         | MODERATE |
| A1:200642178         | T    | G   | SPINK13     | ENSCFCAG00000041823 | ENSCFCAT00000028713   | missense variant                         | MODERATE |
| A1:208845978         | T    | C   | C7          | ENSCFCAG00000031466 | ENSCFCAT00000055412   | missense variant                         | MODERATE |
| A1:215879699         | C    | T   | ZFR         | ENSCFCAG00000000354 | ENSCFCAT00000029163   | missense variant                         | MODERATE |
| A1:226396297         | G    | A   | CDH18       | ENSCFCAG00000013641 | ENSCFCAT00000010822   | inframe deletion                         | MODERATE |
| A1:227755754         | C    | T   | n/a         | ENSCFCAG00000027514 | ENSCFCAT00000059783   | missense variant                         | MODERATE |
| A1:228450994         | G    | A   | MYO10       | ENSCFCAG00000010325 | ENSCFCAT00000031719   | missense variant                         | MODERATE |
| A1:234525747         | C    | T   | TAS2R1      | ENSCFCAG00000012611 | ENSCFCAT00000000354   | missense variant                         | MODERATE |
| A2:1898631           | G    | A   | THOP1       | ENSCFCAG00000015785 | ENSCFCAT00000013645   | missense variant                         | MODERATE |
| A2:3447731           | T    | C   | SEMA6B      | ENSCFCAG00000019404 | ENSCFCAT00000042027   | missense variant                         | MODERATE |
| A2:6705658           | G    | C   | n/a         | ENSCFCAG00000018988 | ENSCFCAT00000065136   | missense variant                         | MODERATE |
| A2:8445900           | G    | A   | LDLR        | ENSCFCAG00000004895 | ENSCFCAT00000031977   | missense variant & splice region variant | MODERATE |
| A2:12858503          | C    | T   | CCDC194     | ENSCFCAG00000046586 | ENSCFCAT00000010331   | missense variant                         | MODERATE |
| A2:13640385          | C    | T   | ELL         | ENSCFCAG00000009739 | ENSCFCAT00000047832   | missense variant                         | MODERATE |
| A2:18819664          | G    | A   | UBA7        | ENSCFCAG00000010680 | ENSCFCAT00000012613   | missense variant                         | MODERATE |
| A2:20512376          | C    | T   | n/a         | ENSCFCAG00000019068 | ENSCFCAT00000015789   | missense variant                         | MODERATE |
| A2:20896501          | G    | C   | GLYCTK      | ENSCFCAG00000015709 | ENSCFCAT00000019041   | missense variant                         | MODIFIER |
| A2:20896867          | C    | T   | MIR135A1    | ENSCFCAG00000030718 | ENSCFCAT00000063409   | missense variant                         | MODERATE |
| A2:20947076          | G    | A   | DNAH1       | ENSCFCAG00000015710 | ENSCFCAT00000018708   | missense variant & splice region variant | MODERATE |
| A2:20954818          | G    | A   | DNAH1       | ENSCFCAG00000015710 | ENSCFCAT00000048996   | missense variant                         | MODERATE |
| A2:20969580          | C    | T   | DNAH1       | ENSCFCAG00000015710 | ENSCFCAT00000066000   | missense variant                         | MODERATE |
| A2:20975304          | C    | T   | DNAH1       | ENSCFCAG00000015710 | ENSCFCAT00000066710   | missense variant                         | MODERATE |
| A2:20986918          | A    | G   | DNAH1       | ENSCFCAG00000015710 | ENSCFCAT00000056716   | missense variant                         | MODERATE |
| A2:20995868          | T    | G   | BAP1        | ENSCFCAG00000015711 | ENSCFCAT0000009741    | missense variant                         | MODERATE |
| A2:21355829          | C    | T   | ITIH3       | ENSCFCAG00000015723 | ENSCFCAT00000009741   | missense variant                         | MODERATE |
| A2:23306612          | A    | G   | CACNA2D3    | ENSCFCAG00000010121 | ENSCFCAT00000010683   | missense variant                         | MODERATE |
| A2:66307090          | A    | G   | SPATA48     | ENSCFCAG00000038962 | ENSCFCAT00000019101   | missense variant                         | MODERATE |
| A2:77886608          | T    | C   | SFRP4       | ENSCFCAG00000025247 | ENSCFCAT00000015713   | missense variant                         | MODERATE |
| A2:88971202          | G    | T   | PCLO        | ENSCFCAG00000002901 | ENSCFCAT00000025862   | missense variant                         | MODIFIER |
| A2:100778052         | C    | T   | DYNC111     | ENSCFCAG00000011808 | ENSCFCAT00000015713   | missense variant                         | MODERATE |
| A2:107175563         | T    | G   | VWDE        | ENSCFCAG00000024923 | ENSCFCAT00000015713   | missense variant                         | MODERATE |
| A2:107381020         | C    | G   | SCIN        | ENSCFCAG00000005088 | ENSCFCAT00000015713   | missense variant                         | MODERATE |
| A2:124558814         | C    | T   | ITPRID1     | ENSCFCAG00000000212 | ENSCFCAT00000015713   | missense variant                         | MODERATE |

|              |             |   |          |                    |                    |                         |          |
|--------------|-------------|---|----------|--------------------|--------------------|-------------------------|----------|
| A2:124620226 | T           | A | PPP1R17  | ENSFCA00000033490  | ENSFCA00000047229  | missense variant        | MODERATE |
|              |             |   |          |                    | ENSFCA00000052229  | missense variant        | MODERATE |
|              |             |   |          |                    | ENSFCA00000054005  | missense variant        | MODERATE |
| A2:166065585 | C           | T | KMT2C    | ENSFCA000000008632 | ENSFCA000000008634 | missense variant        | MODERATE |
| A2:166065695 | C           | T | KMT2C    | ENSFCA000000008632 | ENSFCA000000008634 | missense variant        | MODERATE |
| A3:28959300  | A           | G | n/a      | ENSFCA000000040585 | ENSFCA00000032363  | missense variant        | MODERATE |
|              |             |   |          |                    | ENSFCA00000038516  | missense variant        | MODERATE |
| A3:56844395  | CGCGGTACATG | C | C2orf40  | ENSFCA000000023685 | ENSFCA000000030878 | inframe deletion        | MODERATE |
| A3:81535408  | C           | T | PUS10    | ENSFCA000000008019 | ENSFCA00000008021  | missense variant        | MODERATE |
|              |             |   | n/a      | ENSFCA000000028969 | ENSFCA000000052531 | missense variant        | MODERATE |
|              |             |   | n/a      | ENSFCA000000028969 | ENSFCA000000022328 | upstream gene variant   | MODIFIER |
| A3:84687830  | G           | C | AFTP     | ENSFCA000000028719 | ENSFCA000000023897 | missense variant        | MODERATE |
|              |             |   |          |                    | ENSFCA000000048766 | missense variant        | MODERATE |
| A3:89709015  | G           | A | PCYOX1   | ENSFCA000000030129 | ENSFCA000000031948 | missense variant        | MODERATE |
|              |             |   | n/a      | ENSFCA000000045921 | ENSFCA000000058356 | downstream gene variant | MODIFIER |
|              |             |   | n/a      | ENSFCA000000045921 | ENSFCA000000062195 | downstream gene variant | MODIFIER |
| A3:101970247 | A           | G | DNAH6    | ENSFCA000000000768 | ENSFCA000000000768 | missense variant        | MODERATE |
| A3:107592982 | C           | T | DUSP2    | ENSFCA000000010694 | ENSFCA000000010696 | missense variant        | MODERATE |
| B1:1888286   | G           | A | MYOM2    | ENSFCA000000004727 | ENSFCA00000004734  | missense variant        | MODERATE |
|              |             |   |          |                    | ENSFCA000000061368 | missense variant        | MODERATE |
| B1:7091214   | C           | G | n/a      | ENSFCA000000046076 | ENSFCA000000058055 | missense variant        | MODERATE |
| B1:17112211  | A           | G | CYP4V2   | ENSFCA000000001547 | ENSFCA000000001547 | missense variant        | MODERATE |
| B1:21265815  | G           | A | MTMR7    | ENSFCA000000011961 | ENSFCA000000011964 | missense variant        | MODERATE |
| B1:21634070  | C           | A | MICU3    | ENSFCA000000018279 | ENSFCA000000018303 | missense variant        | MODERATE |
|              |             |   |          |                    | ENSFCA000000049756 | missense variant        | MODERATE |
|              |             |   |          |                    | ENSFCA000000024267 | missense variant        | MODERATE |
| B1:42845162  | T           | C | AP3M2    | ENSFCA000000031044 | ENSFCA000000051861 | missense variant        | MODERATE |
|              |             |   |          |                    | ENSFCA000000065406 | missense variant        | MODERATE |
|              |             |   |          |                    | ENSFCA000000037425 | missense variant        | MODERATE |
| B1:65297575  | A           | G | TMEM192  | ENSFCA000000038577 | ENSFCA000000037425 | missense variant        | MODERATE |
| B1:67245701  | G           | T | NAF1     | ENSFCA000000031652 | ENSFCA000000061274 | missense variant        | MODERATE |
| B1:115410999 | C           | T | EGF      | ENSFCA000000000506 | ENSFCA000000000506 | missense variant        | MODERATE |
|              |             |   |          |                    | ENSFCA000000024046 | missense variant        | MODERATE |
|              |             |   |          |                    | ENSFCA000000034737 | missense variant        | MODERATE |
|              |             |   |          |                    | ENSFCA000000063173 | missense variant        | MODERATE |
| B1:115593791 | A           | G | n/a      | ENSFCA000000000105 | ENSFCA000000000105 | intron variant          | MODIFIER |
|              |             |   |          |                    | ENSFCA000000033262 | intron variant          | MODIFIER |
|              |             |   |          |                    | ENSFCA000000034598 | upstream gene variant   | MODIFIER |
|              |             |   |          |                    | ENSFCA000000035284 | missense variant        | MODERATE |
|              |             |   |          |                    | ENSFCA000000046626 | upstream gene variant   | MODIFIER |
| B1:126201532 | A           | G | n/a      | ENSFCA000000035537 | ENSFCA000000000105 | intron variant          | MODIFIER |
|              |             |   |          |                    | ENSFCA000000000105 | intron variant          | MODIFIER |
| B1:137463098 | C           | G | n/a      | ENSFCA000000030152 | ENSFCA000000041970 | missense variant        | MODERATE |
| B1:138153680 | G           | A | WDFY3    | ENSFCA000000002946 | ENSFCA000000049515 | missense variant        | MODERATE |
| B1:147580951 | C           | A | AREG     | ENSFCA000000000370 | ENSFCA000000002946 | missense variant        | MODERATE |
|              |             |   |          |                    | ENSFCA00000000370  | 5 prime UTR variant     | MODIFIER |
| B1:203565473 | G           | A | n/a      | ENSFCA000000046639 | ENSFCA000000051865 | missense variant        | MODERATE |
| B1:203703029 | G           | T | KIAA0232 | ENSFCA000000010024 | ENSFCA000000066858 | missense variant        | MODERATE |
| B2:3482796   | G           | A | n/a      | ENSFCA000000024356 | ENSFCA000000010026 | missense variant        | MODERATE |
| B2:11920840  | G           | T | NUP153   | ENSFCA000000011583 | ENSFCA000000031800 | missense variant        | MODERATE |
|              |             |   |          |                    | ENSFCA000000011588 | missense variant        | MODERATE |
|              |             |   |          |                    | ENSFCA000000039376 | missense variant        | MODERATE |
| B2:18445365  | G           | A | n/a      | ENSFCA000000038080 | ENSFCA000000047179 | downstream gene variant | MODIFIER |
|              |             |   |          |                    | ENSFCA000000040685 | missense variant        | MODERATE |
| B2:103086853 | T           | C | REV3L    | ENSFCA000000028995 | ENSFCA000000058597 | missense variant        | MODERATE |
|              |             |   |          |                    | ENSFCA000000025874 | missense variant        | MODERATE |
| B2:110042154 | C           | T | MCM9     | ENSFCA000000028710 | ENSFCA000000053725 | missense variant        | MODERATE |
|              |             |   |          |                    | ENSFCA000000026168 | missense variant        | MODERATE |
| B2:125733137 | G           | A | MTFR2    | ENSFCA000000030038 | ENSFCA000000036278 | intron variant          | MODIFIER |
| B2:127552387 | C           | T | ARFGEF3  | ENSFCA000000013904 | ENSFCA000000031085 | missense variant        | MODERATE |
| B2:152910321 | C           | T | UNC93A   | ENSFCA000000006973 | ENSFCA000000013910 | missense variant        | MODERATE |
|              |             |   |          |                    | ENSFCA00000006975  | missense variant        | MODERATE |
| B3:1157394   | C           | T | MINAR1   | ENSFCA000000030462 | ENSFCA000000045258 | missense variant        | MODERATE |
| B3:2077050   | T           | C | CEMIP    | ENSFCA000000012937 | ENSFCA000000022980 | missense variant        | MODERATE |
| B3:2113570   | G           | A | CEMIP    | ENSFCA000000012937 | ENSFCA000000012941 | missense variant        | MODERATE |
| B3:5551356   | C           | T | UNC45A   | ENSFCA00000006097  | ENSFCA000000006099 | downstream gene variant | MODIFIER |
|              |             |   |          |                    | ENSFCA000000061787 | downstream gene variant | MODIFIER |
| B3:48283707  | C           | T | RCCD1    | ENSFCA00000006098  | ENSFCA000000006100 | missense variant        | MODERATE |
| B3:60524114  | T           | G | LIPC     | ENSFCA000000008009 | ENSFCA000000008012 | missense variant        | MODERATE |
| B3:71343323  | G           | A | RVR3     | ENSFCA000000000742 | ENSFCA000000019156 | missense variant        | MODERATE |
|              |             |   |          |                    | ENSFCA000000000742 | missense variant        | MODERATE |
| B3:76288090  | C           | T | THTPA    | ENSFCA000000012059 | ENSFCA000000012062 | downstream gene variant | MODIFIER |
|              |             |   | JPH4     | ENSFCA000000018964 | ENSFCA000000018381 | downstream gene variant | MODIFIER |
|              |             |   | AP1G2    | ENSFCA000000040037 | ENSFCA000000042508 | missense variant        | MODERATE |

|                   |                  |          |         |                   |                    |                                          |                                          |
|-------------------|------------------|----------|---------|-------------------|--------------------|------------------------------------------|------------------------------------------|
| B3:9971839        | A                | G        | KLHDC1  | ENSFCA00000036283 | ENSFCAT00000038314 | missense variant                         | MODERATE                                 |
| B3:99820836       | C                | G        | NEMF    | ENSFCA00000018946 | ENSFCAT00000019170 | missense variant                         | MODERATE                                 |
|                   |                  |          | KLHDC2  | ENSFCA00000031902 | ENSFCA00000028217  | downstream gene variant                  | MODIFIER                                 |
|                   |                  |          |         |                   | ENSFCA00000037457  | downstream gene variant                  | MODIFIER                                 |
| B3:100769651      | G                | T        | ABHD12B | ENSFCA00000002777 | ENSFCAT00000002777 | downstream gene variant                  | MODIFIER                                 |
|                   |                  |          | PYGL    | ENSFCA00000002778 | ENSFCA00000002778  | missense variant                         | MODERATE                                 |
|                   |                  |          |         |                   | ENSFCA00000040133  | missense variant                         | MODERATE                                 |
| B3:124433403      | C                | T        | TMED8   | ENSFCA00000011732 | ENSFCAT00000011734 | missense variant                         | MODERATE                                 |
| B3:124439476      | G                | T        | TMED8   | ENSFCA00000011732 | ENSFCAT00000011734 | missense variant                         | MODERATE                                 |
| B3:124468274      | T                | C        | NOXRED1 | ENSFCA00000039154 | ENSFCAT00000046884 | downstream gene variant                  | MODIFIER                                 |
|                   |                  |          | n/a     | ENSFCA00000042664 | ENSFCAT00000060305 | missense variant                         | MODERATE                                 |
| B3:124719696      | A                | T        | ALKB1   | ENSFCA00000037897 | ENSFCAT00000037675 | missense variant                         | MODERATE                                 |
|                   |                  |          | SLRP    | ENSFCA00000036326 | ENSFCAT00000039204 | upstream gene variant                    | MODIFIER                                 |
|                   |                  |          | SNW1    | ENSFCA00000001637 | ENSFCAT00000001637 | intron variant                           | MODIFIER                                 |
| B3:124734389      | C                | T        | SLRP    | ENSFCA00000036326 | ENSFCAT00000039204 | missense variant & splice region variant | MODERATE                                 |
|                   |                  |          | TTC7B   | ENSFCA00000001583 | ENSFCA00000001583  | missense variant                         | MODERATE                                 |
| ENSFCA00000058981 | missense variant | MODERATE |         |                   |                    |                                          |                                          |
| ENSFCA00000063691 | missense variant | MODERATE |         |                   |                    |                                          |                                          |
| ENSFCA00000067224 | missense variant | MODERATE |         |                   |                    |                                          |                                          |
| B3:139320529      | C                | T        | DDX24   | ENSFCA00000010229 | ENSFCA00000010232  | missense variant                         | MODERATE                                 |
|                   |                  |          |         |                   | ENSFCA00000065890  | missense variant                         | MODERATE                                 |
| B3:139329845      | C                | T        | DDX24   | ENSFCA00000010229 | ENSFCA00000010232  | missense variant                         | MODERATE                                 |
|                   |                  |          |         |                   | ENSFCA00000065890  | missense variant                         | MODERATE                                 |
| B3:140225968      | C                | T        | DICER1  | ENSFCA00000003535 | ENSFCA00000003537  | missense variant                         | MODERATE                                 |
|                   |                  |          |         |                   | ENSFCA00000037515  | missense variant                         | MODERATE                                 |
| B4:5397248        | G                | A        | n/a     | ENSFCA00000009007 | ENSFCA00000009009  | missense variant                         | MODERATE                                 |
| B4:25101091       | G                | A        | MASTL   | ENSFCA00000014240 | ENSFCA00000014244  | missense variant                         | MODERATE                                 |
|                   |                  |          |         |                   | ENSFCA00000034455  | missense variant                         | MODERATE                                 |
| B4:46708262       | T                | G        | KLRK1   | ENSFCA00000040686 | ENSFCAT00000053631 | missense variant                         | MODERATE                                 |
| B4:46708276       | T                | C        | KLRK1   | ENSFCA00000040686 | ENSFCAT00000053631 | missense variant                         | MODERATE                                 |
| B4:46993758       | T                | C        | n/a     | ENSFCA00000025057 | ENSFCA00000022489  | missense variant & splice region variant | MODERATE                                 |
|                   |                  |          |         |                   | ENSFCA00000050581  | missense variant & splice region variant | MODERATE                                 |
| B4:81064790       | A                | G        | KRT74   | ENSFCA00000000290 | ENSFCA00000000288  | missense variant                         | MODERATE                                 |
|                   |                  |          |         |                   | ENSFCA00000050616  | missense variant                         | MODERATE                                 |
| B4:81072162       | A                | C        | KRT74   | ENSFCA00000000290 | ENSFCA00000000288  | missense variant                         | MODERATE                                 |
|                   |                  |          |         |                   | ENSFCA00000050616  | missense variant                         | MODERATE                                 |
| B4:81164526       | A                | G        | KRT4    | ENSFCA00000000295 | ENSFCAT00000000295 | intron variant                           | MODIFIER                                 |
|                   |                  |          | KRT1    | ENSFCA00000042595 | ENSFCAT00000055089 | missense variant                         | MODERATE                                 |
| B4:82671186       | C                | T        | ZNF385A | ENSFCA00000010154 | ENSFCA00000010157  | missense variant                         | MODERATE                                 |
|                   |                  |          |         |                   | ENSFCA00000053337  | intron variant                           | MODIFIER                                 |
| B4:115206387      | G                | A        | LUM     | ENSFCA00000003764 | ENSFCA00000003763  | missense variant                         | MODERATE                                 |
|                   |                  |          |         |                   | ENSFCA00000033907  | missense variant                         | MODERATE                                 |
| B4:126019306      | G                | A        | STAB2   | ENSFCA00000007290 | ENSFCAT00000007294 | missense variant                         | MODERATE                                 |
| B4:126124621      | G                | A        | STAB2   | ENSFCA00000007290 | ENSFCAT00000007294 | missense variant                         | MODERATE                                 |
| B4:126578829      | G                | A        | TXNRD1  | ENSFCA00000003645 | ENSFCA00000003645  | intron variant                           | MODIFIER                                 |
|                   |                  |          |         |                   | ENSFCA00000044250  | missense variant                         | MODERATE                                 |
| B4:127520710      | T                | G        | n/a     | ENSFCA00000036585 | ENSFCA00000043931  | missense variant                         | MODERATE                                 |
|                   |                  |          |         |                   | ENSFCA00000058001  | intron variant                           | MODIFIER                                 |
| B4:127520870      | T                | C        | n/a     | ENSFCA00000036585 | ENSFCA00000043931  | missense variant & splice region variant | MODERATE                                 |
|                   |                  |          |         |                   | ENSFCA00000036585  | ENSFCA00000058001                        | missense variant & splice region variant |
| B4:127524132      | C                | G        | n/a     | ENSFCA00000036585 | ENSFCA00000043931  | missense variant                         | MODERATE                                 |
|                   |                  |          |         |                   | ENSFCA00000058001  | upstream gene variant                    | MODIFIER                                 |
| C1:1984637        | G                | A        | MEGF6   | ENSFCA00000031840 | ENSFCA00000032322  | missense variant                         | MODERATE                                 |
|                   |                  |          |         |                   | ENSFCA00000048790  | missense variant                         | MODERATE                                 |
| C1:7687386        | C                | T        | CAS21   | ENSFCA00000014593 | ENSFCA00000014597  | missense variant                         | MODERATE                                 |
|                   |                  |          |         |                   | ENSFCA00000054128  | missense variant                         | MODERATE                                 |
|                   |                  |          |         |                   | ENSFCA00000058061  | missense variant                         | MODERATE                                 |
| C1:18305859       | G                | A        | NIPAL3  | ENSFCA00000002067 | ENSFCA00000002067  | downstream gene variant                  | MODIFIER                                 |
|                   |                  |          |         |                   | ENSFCA00000036295  | missense variant                         | MODERATE                                 |
| C1:24065622       | T                | C        | COL16A1 | ENSFCA00000015669 | ENSFCA00000015679  | intron variant                           | MODIFIER                                 |
|                   |                  |          |         |                   | ENSFCA00000044147  | missense variant                         | MODERATE                                 |
| C1:30550610       | C                | T        | MACF1   | ENSFCA00000045633 | ENSFCA00000044017  | missense variant                         | MODERATE                                 |
|                   |                  |          |         |                   | ENSFCA00000055061  | missense variant                         | MODERATE                                 |
|                   |                  |          |         |                   | ENSFCA00000055111  | missense variant                         | MODERATE                                 |
|                   |                  |          |         |                   | ENSFCA00000064822  | missense variant                         | MODERATE                                 |
| C1:42573761       | G                | A        | TUT4    | ENSFCA00000003246 | ENSFCA00000003246  | missense variant                         | MODERATE                                 |
| C1:51611279       | T                | C        | DOCK7   | ENSFCA00000022720 | ENSFCA00000032284  | missense variant                         | MODERATE                                 |
|                   |                  |          |         |                   | ENSFCA00000048381  | missense variant                         | MODERATE                                 |
| C1:73288084       | G                | A        | CLCA2   | ENSFCA00000008210 | ENSFCAT00000008212 | missense variant                         | MODERATE                                 |

|                    |                    |                         |         |                    |                    |                         |                    |
|--------------------|--------------------|-------------------------|---------|--------------------|--------------------|-------------------------|--------------------|
| C1:104413373       | C                  | T                       | PDZK1   | ENSFCAG00000013368 | ENSFCAT00000013371 | missense variant        | MODERATE           |
|                    |                    |                         | n/a     | ENSFCAG00000024477 | ENSFCAT00000045829 | missense variant        | MODERATE           |
| C1:107100857       | T                  | G                       | TCHHL1  | ENSFCAG00000046571 | ENSFCAT00000052456 | missense variant        | MODERATE           |
| C1:113656609       | A                  | G                       | MYO7B   | ENSFCAG00000013176 | ENSFCAT00000013180 | missense variant        | MODERATE           |
|                    |                    |                         |         |                    | ENSFCAT00000036804 | intron variant          | MODIFIER           |
|                    |                    |                         |         |                    | ENSFCAT00000038750 | intron variant          | MODIFIER           |
| C1:113705761       | C                  | A                       | IWS1    | ENSFCAG00000009026 | ENSFCAT00000009028 | missense variant        | MODERATE           |
|                    |                    |                         |         |                    | ENSFCAT00000037913 | intron variant          | MODIFIER           |
| C1:154085770       | G                  | A                       | IFIH1   | ENSFCAG00000023951 | ENSFCAT00000007305 | missense variant        | MODERATE           |
|                    |                    |                         |         |                    | ENSFCAT00000026735 | missense variant        | MODERATE           |
|                    |                    |                         |         |                    | ENSFCAT00000061411 | missense variant        | MODERATE           |
| C1:161995864       | GGCCGCGGCC         | G                       | SP5     | ENSFCAG00000044347 | ENSFCAT00000050366 | inframe deletion        | MODERATE           |
| C1:164281618       | G                  | A                       | n/a     | ENSFCAG00000008059 | ENSFCAT00000054583 | missense variant        | MODERATE           |
| C1:164350082       | T                  | C                       | CDCA7   | ENSFCAG00000005476 | ENSFCAT00000005479 | missense variant        | MODERATE           |
|                    |                    |                         |         |                    | ENSFCAT00000042357 | missense variant        | MODERATE           |
| C1:165241721       | G                  | GGAA                    | CIR1    | ENSFCAG00000022845 | ENSFCAT00000050183 | missense variant        | MODERATE           |
|                    |                    |                         |         |                    | ENSFCAT00000030886 | inframe insertion       | MODERATE           |
| C1:165593144       | A                  | T                       | CHRNA1  | ENSFCAG00000014103 | ENSFCAT00000014107 | missense variant        | MODERATE           |
|                    |                    |                         |         |                    | ENSFCAT00000054627 | missense variant        | MODERATE           |
|                    |                    |                         |         |                    | ENSFCAT00000065105 | missense variant        | MODERATE           |
| C1:169226811       | G                  | A                       | n/a     | ENSFCAG00000046559 | ENSFCAT00000054332 | missense variant        | MODERATE           |
|                    |                    |                         |         |                    | ENSFCAT00000057628 | missense variant        | MODERATE           |
| C1:195274259       | G                  | A                       | n/a     | ENSFCAG00000041864 | ENSFCAT00000031236 | missense variant        | MODERATE           |
| C1:203392796       | T                  | C                       | AAMP    | ENSFCAG00000002372 | ENSFCAT00000002372 | upstream gene variant   | MODIFIER           |
|                    |                    |                         |         |                    | ENSFCAT00000053285 | upstream gene variant   | MODIFIER           |
|                    |                    |                         | TMBIM1  | ENSFCAG00000002374 | ENSFCAT00000002374 | downstream gene variant | MODIFIER           |
|                    |                    |                         |         |                    | n/a                | ENSFCAG00000040250      | ENSFCAT00000053237 |
| C1:219283421       | C                  | T                       | COL6A3  | ENSFCAG00000012720 | ENSFCAT00000012724 | missense variant        | MODERATE           |
|                    |                    |                         |         |                    | ENSFCAT00000051285 | missense variant        | MODERATE           |
|                    |                    |                         |         |                    | ENSFCAT00000052409 | missense variant        | MODERATE           |
|                    |                    |                         |         |                    | ENSFCAT00000056790 | missense variant        | MODERATE           |
|                    |                    |                         |         |                    | ENSFCAT00000063857 | missense variant        | MODERATE           |
| C1:220011772       | A                  | G                       | n/a     | ENSFCAG00000046551 | ENSFCAT00000052753 | missense variant        | MODERATE           |
| C1:221728541       | G                  | C                       | ANKMY1  | ENSFCAG00000012464 | ENSFCAT00000012469 | missense variant        | MODERATE           |
|                    |                    |                         |         |                    | ENSFCAT00000036897 | missense variant        | MODERATE           |
|                    |                    |                         |         |                    | ENSFCAT00000037799 | missense variant        | MODERATE           |
|                    |                    |                         |         |                    | ENSFCAT00000039736 | missense variant        | MODERATE           |
|                    |                    |                         |         |                    | ENSFCAT00000040710 | missense variant        | MODERATE           |
| C1:221768848       | C                  | T                       | CAPN10  | ENSFCAG00000012470 | ENSFCAT00000012473 | missense variant        | MODERATE           |
|                    |                    |                         |         |                    | ENSFCAT00000036494 | missense variant        | MODERATE           |
|                    |                    |                         |         |                    | ENSFCAT00000063353 | intron variant          | MODIFIER           |
|                    |                    |                         |         |                    | ENSFCAT00000063602 | intron variant          | MODIFIER           |
| C1:221791166       | C                  | T                       | GPR35   | ENSFCAG00000024715 | ENSFCAT00000027678 | missense variant        | MODERATE           |
| C2:650249          | G                  | A                       | SPATC1L | ENSFCAG00000014816 | ENSFCAT00000014820 | missense variant        | MODERATE           |
| C2:1931874         | G                  | GTGAGCACACGGGCT         | TSPEAR  | ENSFCAG00000001772 | ENSFCAT00000001772 | intron variant          | MODIFIER           |
|                    |                    |                         |         |                    | ENSFCAT00000035693 | inframe insertion       | MODERATE           |
|                    |                    |                         | n/a     | ENSFCAG00000033709 | ENSFCAT00000034604 | downstream gene variant | MODIFIER           |
| C2:2111583         | C                  | T                       | TRPM2   | ENSFCAG00000009173 | ENSFCAT00000009175 | missense variant        | MODERATE           |
|                    |                    |                         |         |                    | ENSFCAT00000056225 | missense variant        | MODERATE           |
|                    |                    |                         |         |                    | ENSFCAT00000060156 | missense variant        | MODERATE           |
|                    |                    |                         | RF00285 | ENSFCAG00000035800 | ENSFCAT00000033694 | downstream gene variant | MODIFIER           |
| ENSFCAG00000034468 | ENSFCAT00000036764 | downstream gene variant |         | MODIFIER           |                    |                         |                    |
| C2:2117668         | GTCC               | G                       | TRPM2   | ENSFCAG00000009173 | ENSFCAT00000009175 | inframe deletion        | MODERATE           |
|                    |                    |                         |         |                    | ENSFCAT00000056225 | inframe deletion        | MODERATE           |
|                    |                    |                         |         |                    | ENSFCAT00000060156 | inframe deletion        | MODERATE           |
|                    |                    |                         | RF00285 | ENSFCAG00000035800 | ENSFCAT00000033694 | upstream gene variant   | MODIFIER           |
| ENSFCAG00000034468 | ENSFCAT00000036764 | upstream gene variant   |         | MODIFIER           |                    |                         |                    |
| C2:2170115         | G                  | C                       | CFAP410 | ENSFCAG00000040115 | ENSFCAT00000040416 | missense variant        | MODERATE           |
|                    |                    |                         |         |                    | ENSFCAT00000059030 | missense variant        | MODERATE           |
| C2:2359138         | C                  | T                       | n/a     | ENSFCAG00000004487 | ENSFCAT00000004491 | missense variant        | MODERATE           |
|                    |                    |                         |         |                    | ENSFCAT00000037759 | missense variant        | MODERATE           |
|                    |                    |                         |         |                    | ENSFCAT00000008440 | downstream gene variant | MODIFIER           |
| C2:8372249         | C                  | T                       | VPS26C  | ENSFCAG00000012830 | ENSFCAT00000012834 | missense variant        | MODERATE           |
|                    |                    |                         |         |                    | ENSFCAT00000047540 | missense variant        | MODERATE           |
|                    |                    |                         |         |                    | ENSFCAT00000050115 | missense variant        | MODERATE           |
|                    |                    |                         |         |                    | ENSFCAT00000060256 | missense variant        | MODERATE           |
| C2:48628614        | G                  | A                       | TFG     | ENSFCAG00000025659 | ENSFCAT00000027637 | missense variant        | MODERATE           |
|                    |                    |                         |         |                    | ENSFCAT00000050806 | missense variant        | MODERATE           |
|                    |                    |                         |         |                    | ENSFCAT00000059364 | missense variant        | MODERATE           |
| C2:55837148        | G                  | A                       | RETNLB  | ENSFCAG00000036016 | ENSFCAT00000049101 | missense variant        | MODERATE           |
| C2:84089300        | C                  | A                       | SEN2P   | ENSFCAG00000042538 | ENSFCAT00000055178 | missense variant        | MODERATE           |
| C2:95840959        | G                  | A                       | NCEH1   | ENSFCAG00000028457 | ENSFCAT00000024541 | missense variant        | MODERATE           |
| C2:107223987       | C                  | A                       | IL12A   | ENSFCAG00000011130 | ENSFCAT00000011133 | missense variant        | MODERATE           |
| C2:116164833       | C                  | T                       | TSC22D2 | ENSFCAG00000031850 | ENSFCAT00000023131 | missense variant        | MODERATE           |
|                    |                    |                         |         |                    | ENSFCAT00000047483 | missense variant        | MODERATE           |

|              |   |         |          |                     |                     |                          |                  |          |
|--------------|---|---------|----------|---------------------|---------------------|--------------------------|------------------|----------|
| C2:156182225 | G | A       | DCLK3    | ENSFCAG00000022392  | ENSFCAT00000032249  | missense variant         | MODERATE         |          |
|              |   |         |          |                     | ENSFCAT00000063849  | missense variant         | MODERATE         |          |
| D1:1515464   | C | T       | MMP13    | ENSFCAG00000000118  | ENSFCAT00000000118  | missense variant         | MODERATE         |          |
| D1:12166851  | G | A       | NNMT     | ENSFCAG000000037839 | ENSFCAT00000037849  | missense variant         | MODERATE         |          |
|              |   |         |          |                     | ENSFCAT00000001167  | missense variant         | MODERATE         |          |
| D1:16618344  | G | A       | NLRX1    | ENSFCAG000000001167 | ENSFCAT00000043500  | missense variant         | MODERATE         |          |
|              |   |         |          |                     | ENSFCAT00000001168  | upstream gene variant    | MODIFIER         |          |
|              |   |         | PDZD3    | ENSFCAG000000001168 | ENSFCAT00000037361  | upstream gene variant    | MODIFIER         |          |
| D1:16627280  | G | A       | PDZD3    | ENSFCAG000000001168 | ENSFCAT00000001168  | downstream gene variant  | MODIFIER         |          |
|              |   |         |          |                     | ENSFCAT00000037361  | downstream gene variant  | MODIFIER         |          |
|              |   |         | CCDC153  | ENSFCAG000000001169 | ENSFCAT00000001169  | missense variant         | MODERATE         |          |
| D1:16629401  | C | T       | PDZD3    | ENSFCAG000000001168 | ENSFCAT00000001168  | downstream gene variant  | MODIFIER         |          |
|              |   |         |          |                     | ENSFCAT00000037361  | downstream gene variant  | MODIFIER         |          |
|              |   |         | CCDC153  | ENSFCAG000000001169 | ENSFCAT00000001169  | missense variant         | MODERATE         |          |
| D1:23231738  | A | T       | RPUSD4   | ENSFCAG000000029789 | ENSFCAT00000022983  | missense variant         | MODERATE         |          |
| D1:40592747  | A | G       | SESN3    | ENSFCAG000000005081 | ENSFCAT00000005082  | missense variant         | MODERATE         |          |
|              |   |         |          |                     | ENSFCAT00000056681  | missense variant         | MODERATE         |          |
|              |   |         |          |                     | ENSFCAT00000057835  | missense variant         | MODERATE         |          |
| D1:61137254  | C | CCCCCGG | ARAP1    | ENSFCAG000000013192 | ENSFCAT000000013196 | protein altering variant | MODERATE         |          |
|              |   |         |          |                     | ENSFCAT00000055940  | protein altering variant | MODERATE         |          |
| D1:89038010  | A | G       | QSER1    | ENSFCAG000000015204 | ENSFCAT000000015210 | missense variant         | MODERATE         |          |
|              |   |         |          |                     | ENSFCAT00000040727  | missense variant         | MODERATE         |          |
|              |   |         |          |                     | ENSFCAT00000062010  | missense variant         | MODERATE         |          |
| D1:109146850 | A | AGGC    | RTN3     | ENSFCAG000000023202 | ENSFCAT000000024505 | downstream gene variant  | MODIFIER         |          |
|              |   |         |          |                     | ENSFCAT00000066093  | downstream gene variant  | MODIFIER         |          |
|              |   |         | C11orf95 | ENSFCAG000000032639 | ENSFCAT00000033573  | inframe insertion        | MODERATE         |          |
|              |   |         |          |                     | ENSFCAT00000055356  | downstream gene variant  | MODIFIER         |          |
| D1:110362164 | C | T       | CAPN1    | ENSFCAG000000001438 | ENSFCAT000000001438 | missense variant         | MODERATE         |          |
|              |   |         |          |                     | ENSFCAT00000058310  | missense variant         | MODERATE         |          |
| D1:113819532 | G | T       | CCND1    | ENSFCAG000000008358 | ENSFCAT000000008360 | missense variant         | MODERATE         |          |
|              |   |         |          |                     | ENSFCAT00000058874  | downstream gene variant  | MODIFIER         |          |
| D2:6677819   | C | A       | A1CF     | ENSFCAG000000011779 | ENSFCAT000000011182 | missense variant         | MODERATE         |          |
|              |   |         |          |                     | ENSFCAT00000067045  | missense variant         | MODERATE         |          |
| D2:8660764   | A | C       | FAS      | ENSFCAG000000033129 | ENSFCAT000000036758 | missense variant         | MODERATE         |          |
|              |   |         |          |                     | ENSFCAT00000001248  | missense variant         | MODERATE         |          |
| D2:62911000  | C | T       | ACTR1A   | ENSFCAG000000001248 | ENSFCAT000000058888 | downstream gene variant  | MODIFIER         |          |
|              |   |         | MFSD13A  | ENSFCAG000000023881 | ENSFCAT000000028865 | downstream gene variant  | MODIFIER         |          |
| D2:64308953  | C | T       | COL17A1  | ENSFCAG000000004299 | ENSFCAT000000004301 | missense variant         | MODERATE         |          |
|              |   |         |          |                     | ENSFCAT000000046187 | missense variant         | MODERATE         |          |
| D3:19138629  | C | A       | GSTT4    | ENSFCAG000000036794 | ENSFCAT000000045313 | missense variant         | MODERATE         |          |
| D3:19160731  | C | A       | n/a      | ENSFCAG000000022623 | ENSFCAT000000022132 | downstream gene variant  | MODIFIER         |          |
|              |   |         |          |                     | ENSFCAG000000035422 | ENSFCAT000000040173      | missense variant | MODERATE |
| D3:55423196  | G | C       | DSG2     | ENSFCAG000000031128 | ENSFCAT000000023465 | missense variant         | MODERATE         |          |
| D3:55423210  | G | A       | DSG2     | ENSFCAG000000031128 | ENSFCAT000000023465 | missense variant         | MODERATE         |          |
|              |   |         |          |                     | ENSFCAT00000008816  | missense variant         | MODERATE         |          |
| D4:11831268  | C | T       | n/a      | ENSFCAG000000008814 | ENSFCAT000000058936 | missense variant         | MODERATE         |          |
|              |   |         |          |                     | ENSFCAT00000060196  | missense variant         | MODERATE         |          |
|              |   |         |          |                     | ENSFCAT00000061958  | missense variant         | MODERATE         |          |
|              |   |         |          |                     | ENSFCAT00000064926  | missense variant         | MODERATE         |          |
| D4:17623266  | G | A       | PCSK5    | ENSFCAG000000027896 | ENSFCAT000000024077 | missense variant         | MODERATE         |          |
|              |   |         |          |                     | ENSFCAT00000050249  | missense variant         | MODERATE         |          |
|              |   |         |          |                     | ENSFCAT00000059461  | 5 prime UTR variant      | MODIFIER         |          |
| D4:18650803  | G | G       | FOXB2    | ENSFCAG000000046576 | ENSFCAT000000056177 | inframe deletion         | MODERATE         |          |
| D4:29961035  | T | C       | n/a      | ENSFCAG000000002729 | ENSFCAT000000002729 | missense variant         | MODERATE         |          |
| D4:61261685  | G | C       | FRMPD1   | ENSFCAG000000011920 | ENSFCAT000000011923 | missense variant         | MODERATE         |          |
|              |   |         | TRMT10B  | ENSFCAG000000035239 | ENSFCAT000000040640 | upstream gene variant    | MODIFIER         |          |
| D4:61380631  | A | G       | n/a      | ENSFCAG000000036372 | ENSFCAT000000036949 | missense variant         | MODERATE         |          |
|              |   |         |          |                     | ENSFCAT000000008629 | missense variant         | MODERATE         |          |
| D4:81633846  | G | A       | CDK5RAP2 | ENSFCAG000000008625 | ENSFCAT000000054488 | missense variant         | MODERATE         |          |
|              |   |         |          |                     | ENSFCAT000000057225 | missense variant         | MODERATE         |          |
| D4:81969996  | G | A       | PSMD5    | ENSFCAG000000001313 | ENSFCAT000000001312 | downstream gene variant  | MODIFIER         |          |
|              |   |         |          |                     | ENSFCAT000000057489 | downstream gene variant  | MODIFIER         |          |
|              |   |         | B3GNT10  | ENSFCAG000000022327 | ENSFCAT000000029226 | missense variant         | MODERATE         |          |

|             |   |   |          |                       |                       |                                          |          |
|-------------|---|---|----------|-----------------------|-----------------------|------------------------------------------|----------|
| D4:91123222 | G | C | LAMC3    | ENSFACAG00000005118   | ENSFACAT00000005119   | missense variant                         | MODERATE |
| E1:14535925 | A | T | MNT      | ENSFACAG00000006315   | ENSFACAT000000035165  | missense variant                         | MODERATE |
|             |   |   |          |                       | ENSFACAT000000058918  | downstream gene variant                  | MODIFIER |
| E1:15201590 | G | A | SCARF1   | ENSFACAG000000044300  | ENSFACAT000000062099  | missense variant                         | MODERATE |
| E1:16753714 | C | T | NSRP1    | ENSFACAG000000039697  | ENSFACAT000000035282  | missense variant                         | MODERATE |
| E1:16968924 | C | T | EFCAB5   | ENSFACAG00000004649   | ENSFACAT00000004651   | missense variant                         | MODERATE |
|             |   |   | n/a      | ENSFACAG000000044178  | ENSFACAT000000057662  | upstream gene variant                    | MODIFIER |
| E1:17328108 | C | T | ABHD15   | ENSFACAG00000002756   | ENSFACAT00000002756   | upstream gene variant                    | MODIFIER |
|             |   |   | TP53I13  | ENSFACAG00000002757   | ENSFACAT00000002757   | missense variant                         | MODERATE |
|             |   |   | GIT1     | ENSFACAG00000002758   | ENSFACAT000000042777  | downstream gene variant                  | MODIFIER |
|             |   |   |          |                       | ENSFACAT000000047071  | downstream gene variant                  | MODIFIER |
| E1:30545053 | C | T | TSPOAP1  | ENSFACAG000000012264  | ENSFACAT000000012268  | missense variant                         | MODERATE |
|             |   |   |          |                       | ENSFACAT000000044954  | missense variant                         | MODERATE |
| E1:30636189 | G | A | MKS1     | ENSFACAG000000012261  | ENSFACAT000000012264  | missense variant                         | MODERATE |
|             |   |   | n/a      | ENSFACAG000000034800  | ENSFACAT000000052159  | missense variant                         | MODERATE |
|             |   |   |          |                       | ENSFACAT000000033967  | downstream gene variant                  | MODIFIER |
| E1:30682939 | G | A | OR4D1    | ENSFACAG000000044467  | ENSFACAT000000030441  | missense variant                         | MODERATE |
| E1:31056420 | C | T | CCDC182  | ENSFACAG000000001699  | ENSFACAT000000001699  | missense variant                         | MODERATE |
| E1:36539075 | C | T | MBTD1    | ENSFACAG000000006743  | ENSFACAT000000006745  | upstream gene variant                    | MODIFIER |
|             |   |   |          |                       | ENSFACAT000000041488  | upstream gene variant                    | MODIFIER |
|             |   |   | UTP18    | ENSFACAG000000031396  | ENSFACAT000000029778  | missense variant                         | MODERATE |
|             |   |   |          |                       | ENSFACAT000000030760  | missense variant                         | MODERATE |
| E1:37265200 | G | A | EME1     | ENSFACAG000000012332  | ENSFACAT000000012335  | downstream gene variant                  | MODIFIER |
|             |   |   | LRRC59   | ENSFACAG000000031770  | ENSFACAT000000022309  | missense variant                         | MODERATE |
| E1:41039872 | G | A | MED24    | ENSFACAG000000014993  | ENSFACAT000000014997  | intron variant                           | MODIFIER |
|             |   |   |          |                       | ENSFACAT000000041870  | missense variant                         | MODERATE |
|             |   |   |          |                       | ENSFACAT000000043432  | intron variant                           | MODIFIER |
|             |   |   |          |                       | ENSFACAT000000046079  | intron variant                           | MODIFIER |
|             |   |   |          |                       | ENSFACAT000000051893  | intron variant                           | MODIFIER |
|             |   |   | RF01211  | ENSFACAG000000033090  | ENSFACAT000000034933  | downstream gene variant                  | MODIFIER |
|             |   |   | CSF3     | ENSFACAG000000040124  | ENSFACAT000000043767  | downstream gene variant                  | MODIFIER |
|             |   |   |          |                       | ENSFACAT000000063974  | downstream gene variant                  | MODIFIER |
| E1:41147641 | A | G | CASC3    | ENSFACAG000000014998  | ENSFACAT000000015002  | missense variant                         | MODERATE |
| E1:44190339 | G | C | HDAC5    | ENSFACAG000000002199  | ENSFACAT000000002199  | missense variant                         | MODERATE |
|             |   |   |          |                       | ENSFACAT000000036901  | missense variant                         | MODERATE |
| E1:44239695 | G | C | C17orf53 | ENSFACAG000000008021  | ENSFACAT000000008023  | missense variant & splice region variant | MODERATE |
|             |   |   |          |                       | ENSFACAT000000065449  | intron variant                           | MODIFIER |
| E1:44726300 | G | A | DBF4B    | ENSFACAG000000023490  | ENSFACAT000000023498  | missense variant                         | MODERATE |
|             |   |   |          |                       | ENSFACAT000000060046  | missense variant                         | MODERATE |
| E1:45347104 | C | A | n/a      | ENSFACAG000000046546  | ENSFACAT000000053446  | missense variant                         | MODERATE |
|             |   |   |          |                       | ENSFACAT000000061422  | intron variant                           | MODIFIER |
| E1:45347109 | G | A | n/a      | ENSFACAG000000046546  | ENSFACAT000000053446  | missense variant                         | MODERATE |
|             |   |   |          |                       | ENSFACAT000000061422  | intron variant                           | MODIFIER |
| E1:45347329 | C | T | n/a      | ENSFACAG000000046546  | ENSFACAT000000053446  | missense variant                         | MODERATE |
|             |   |   |          |                       | ENSFACAT000000061422  | intron variant                           | MODIFIER |
| E1:61100712 | C | T | RNF213   | ENSFACAG000000000945  | ENSFACAT000000000947  | missense variant                         | MODERATE |
|             |   |   |          |                       | ENSFACAT000000040505  | missense variant                         | MODERATE |
| E1:61769120 | C | T | TEPSIN   | ENSFACAG000000007574  | ENSFACAT000000007575  | missense variant                         | MODERATE |
| E2:391338   | G | A | ZNF132   | ENSFACAG000000034735  | ENSFACAT000000037402  | missense variant                         | MODERATE |
| E2:3164628  | C | G | SBK2     | ENSFACAG000000018172  | ENSFACAT000000019391  | missense variant                         | MODERATE |
|             |   |   | n/a      | ENSFACAG000000005639  | ENSFACAT000000005641  | upstream gene variant                    | MODIFIER |
| E2:3275072  | C | T | TMEM238  | ENSFACAG000000042544  | ENSFACAT000000051974  | missense variant                         | MODERATE |
|             |   |   | TMEM190  | ENSFACAG000000044046  | ENSFACAT000000058607  | downstream gene variant                  | MODIFIER |
|             |   |   | n/a      | ENSFACAG000000005637  | ENSFACAT000000027091  | missense variant                         | MODERATE |
| E2:3296678  | C | G | COX6B2   | ENSFACAG000000045733  | ENSFACAT000000054765  | upstream gene variant                    | MODIFIER |
|             |   |   |          |                       | ENSFACAT000000062952  | upstream gene variant                    | MODIFIER |
| E2:4510569  | A | C | n/a      | ENSFACAG000000000122  | ENSFACAT000000000122  | missense variant                         | MODERATE |
| E2:7229279  | C | T | n/a      | ENSFACAG00000002858   | ENSFACAT000000000274  | missense variant                         | MODERATE |
|             |   |   |          |                       | ENSFACAT000000002858  | missense variant                         | MODERATE |
|             |   |   |          |                       | ENSFACAT000000013695  | missense variant                         | MODERATE |
| E2:7279785  | T | C | n/a      | ENSFACAG0000000046174 | ENSFACAT0000000063304 | missense variant                         | MODERATE |
| E2:10578436 | G | A | PTGIR    | ENSFACAG000000027533  | ENSFACAT000000031423  | missense variant                         | MODERATE |
| E2:11383116 | A | T | PPP1R13L | ENSFACAG000000033518  | ENSFACAT000000033821  | missense variant                         | MODERATE |
| E2:12882208 | G | A | LYPD3    | ENSFACAG000000025558  | ENSFACAT000000022021  | missense variant                         | MODERATE |
| E2:12980296 | C | G | n/a      | ENSFACAG000000042962  | ENSFACAT000000050319  | missense variant                         | MODERATE |
| E2:12980375 | C | A | n/a      | ENSFACAG000000042962  | ENSFACAT000000050319  | missense variant                         | MODERATE |
| E2:12980725 | T | C | n/a      | ENSFACAG000000042962  | ENSFACAT000000050319  | missense variant                         | MODERATE |
| E2:13013310 | T | C | n/a      | ENSFACAG000000044759  | ENSFACAT000000053023  | missense variant                         | MODERATE |
| E2:13163878 | T | C | GRIK5    | ENSFACAG000000012730  | ENSFACAT000000012733  | missense variant                         | MODERATE |



|             |   |   |         |                  |                  |                         |          |
|-------------|---|---|---------|------------------|------------------|-------------------------|----------|
|             |   |   |         |                  | ENSF00000055225  | missense variant        | MODERATE |
|             |   |   |         |                  | ENSF00000057632  | missense variant        | MODERATE |
|             |   |   |         |                  | ENSF00000062684  | missense variant        | MODERATE |
|             |   |   |         |                  | ENSF00000063192  | missense variant        | MODERATE |
|             |   |   |         |                  | ENSF00000065353  | missense variant        | MODERATE |
| E2:13328101 | C | T | ERF     | ENSF00000030101  | ENSF00000029651  | missense variant        | MODERATE |
| E2:32289680 | C | T | n/a     | ENSF00000030405  | ENSF00000028957  | missense variant        | MODERATE |
|             |   |   | KATNB1  | ENSF00000002687  | ENSF00000002687  | missense variant        | MODERATE |
| E2:36806817 | A | G | KIFC3   | ENSF00000002689  | ENSF000000035824 | downstream gene variant | MODIFIER |
|             |   |   |         |                  | ENSF000000037293 | downstream gene variant | MODIFIER |
|             |   |   |         |                  | ENSF000000045877 | downstream gene variant | MODIFIER |
|             |   |   |         |                  | ENSF000000051211 | downstream gene variant | MODIFIER |
| E3:774328   | T | C | DNAAF5  | ENSF00000005248  | ENSF000000038033 | missense variant        | MODERATE |
| E3:797033   | C | T | DNAAF5  | ENSF00000005248  | ENSF000000038033 | missense variant        | MODERATE |
| E3:797036   | G | A | DNAAF5  | ENSF00000005248  | ENSF000000038033 | missense variant        | MODERATE |
| E3:1683102  | C | T | MAD1L1  | ENSF00000005389  | ENSF00000005390  | missense variant        | MODERATE |
| E3:2251003  | G | A | IQCE    | ENSF000000025676 | ENSF000000027142 | missense variant        | MODERATE |
|             |   |   |         |                  | ENSF000000036337 | missense variant        | MODERATE |
| E3:2304718  | C | T | BRAT1   | ENSF000000031391 | ENSF000000032068 | missense variant        | MODERATE |
| E3:2312083  | G | A | BRAT1   | ENSF000000031391 | ENSF000000032068 | missense variant        | MODERATE |
|             |   |   |         |                  | ENSF00000008563  | missense variant        | MODERATE |
| E3:2503530  | G | A | CARD11  | ENSF00000008561  | ENSF000000036684 | missense variant        | MODERATE |
|             |   |   |         |                  | ENSF000000061721 | missense variant        | MODERATE |
| E3:5354310  | T | C | EIF2AK1 | ENSF00000008465  | ENSF000000024848 | intron variant          | MODIFIER |
|             |   |   | ANKRD61 | ENSF000000027842 | ENSF000000033423 | missense variant        | MODERATE |
| E3:7130119  | G | C | n/a     | ENSF000000023135 | ENSF000000046678 | missense variant        | MODERATE |
| E3:7878324  | C | T | ZAN     | ENSF00000006851  | ENSF00000006853  | missense variant        | MODERATE |
|             |   |   |         |                  | ENSF000000054763 | missense variant        | MODERATE |
| E3:7878456  | A | G | ZAN     | ENSF00000006851  | ENSF00000006853  | missense variant        | MODERATE |
|             |   |   |         |                  | ENSF000000054763 | missense variant        | MODERATE |
|             |   |   |         |                  | ENSF00000008710  | intron variant          | MODIFIER |
| E3:15165314 | G | T | n/a     | ENSF00000008708  | ENSF000000034285 | intron variant          | MODIFIER |
|             |   |   |         |                  | ENSF000000053064 | upstream gene variant   | MODIFIER |
|             |   |   |         |                  | ENSF000000063874 | missense variant        | MODERATE |
| E3:20493402 | G | A | PRSS53  | ENSF00000002602  | ENSF00000002602  | missense variant        | MODERATE |
|             |   |   | ZNF668  | ENSF00000008954  | ENSF00000008956  | intron variant          | MODIFIER |
|             |   |   | ZNF646  | ENSF000000021918 | ENSF000000027839 | downstream gene variant | MODIFIER |
| F1:17988451 | T | C | CENPL   | ENSF000000013044 | ENSF000000013048 | missense variant        | MODERATE |
|             |   |   |         |                  | ENSF000000006475 | missense variant        | MODERATE |
| F1:20764018 | C | T | ASTN1   | ENSF00000006473  | ENSF000000039511 | missense variant        | MODERATE |
|             |   |   |         |                  | ENSF000000053463 | missense variant        | MODERATE |
| F1:23027052 | A | C | SOAT1   | ENSF00000007880  | ENSF00000007882  | intron variant          | MODIFIER |
|             |   |   | n/a     | ENSF000000036745 | ENSF000000060726 | intron variant          | MODIFIER |
| F1:23028528 | G | C | SOAT1   | ENSF00000007880  | ENSF00000007882  | intron variant          | MODIFIER |
|             |   |   | n/a     | ENSF000000036745 | ENSF000000060726 | intron variant          | MODIFIER |
|             |   |   |         |                  | ENSF000000047543 | missense variant        | MODERATE |
| F1:28499581 | C | T | CACNA1E | ENSF000000015444 | ENSF000000015448 | missense variant        | MODERATE |
|             |   |   |         |                  | ENSF000000032756 | missense variant        | MODERATE |
|             |   |   |         |                  | ENSF000000047607 | missense variant        | MODERATE |
| F1:30078275 | C | T | CEP350  | ENSF000000014835 | ENSF000000014843 | missense variant        | MODERATE |
|             |   |   | IARS2   | ENSF000000002597 | ENSF000000002597 | missense variant        | MODERATE |
| F1:59343562 | C | G | BPNT1   | ENSF000000026600 | ENSF000000045775 | upstream gene variant   | MODIFIER |
| F1:60046003 | C | G | HLX     | ENSF000000034331 | ENSF000000039455 | missense variant        | MODERATE |
| F1:61342644 | C | T | HHIPL2  | ENSF000000002257 | ENSF000000002257 | missense variant        | MODERATE |
| F1:62240122 | G | A | ALDH9A1 | ENSF000000004312 | ENSF000000004313 | missense variant        | MODERATE |
| F1:68196401 | G | A | CD1B    | ENSF000000008648 | ENSF000000008650 | missense variant        | MODERATE |
| F1:69370149 | G | A | BCAN    | ENSF00000006557  | ENSF000000006559 | missense variant        | MODERATE |
|             |   |   |         |                  | ENSF000000058402 | missense variant        | MODERATE |
|             |   |   | TMEM79  | ENSF000000011787 | ENSF000000011789 | missense variant        | MODERATE |
| F1:69629361 | A | G | GLMP    | ENSF000000011788 | ENSF000000011790 | downstream gene variant | MODIFIER |
|             |   |   |         |                  | ENSF000000058515 | downstream gene variant | MODIFIER |
|             |   |   | SMG5    | ENSF000000011783 | ENSF000000050065 | upstream gene variant   | MODIFIER |
| F1:69787409 | G | A | RAB25   | ENSF000000011775 | ENSF000000011777 | missense variant        | MODERATE |
|             |   |   | LAMTOR2 | ENSF000000028596 | ENSF000000023659 | downstream gene variant | MODIFIER |
|             |   |   |         |                  | ENSF000000043261 | downstream gene variant | MODIFIER |
| F1:70279561 | G | T | RUSC1   | ENSF000000024900 | ENSF000000026005 | missense variant        | MODERATE |
|             |   |   | RUSC1   | ENSF000000024900 | ENSF000000055419 | upstream gene variant   | MODIFIER |
|             |   |   | FDP5    | ENSF000000039350 | ENSF000000034725 | downstream gene variant | MODIFIER |
| F1:70502868 | G | A | DCST1   | ENSF000000018847 | ENSF000000018172 | missense variant        | MODERATE |
|             |   |   |         |                  | ENSF000000058210 | missense variant        | MODERATE |
|             |   |   | DCST2   | ENSF000000040157 | ENSF000000053006 | synonymous variant      | LOW      |

|             |   |   |         |                   |                    |                                          |          |
|-------------|---|---|---------|-------------------|--------------------|------------------------------------------|----------|
| F1:70503591 | G | A | DCST1   | ENSFCA00000018847 | ENSFCAT00000018172 | upstream gene variant                    | MODIFIER |
|             |   |   |         |                   | ENSFCAT00000058210 | upstream gene variant                    | MODIFIER |
| F1:70932845 | T | C | DCST2   | ENSFCA00000040157 | ENSFCAT00000053006 | missense variant                         | MODERATE |
|             |   |   |         |                   | ENSFCAT00000028335 | missense variant                         | MODERATE |
|             |   |   | IL6R    | ENSFCA00000026747 | ENSFCAT00000057276 | missense variant                         | MODERATE |
| F2:81054785 | C | T | COL22A1 | ENSFCA00000040466 | ENSFCAT00000031166 | upstream gene variant                    | MODIFIER |
|             |   |   |         |                   | ENSFCAT00000056098 | missense variant & splice region variant | MODERATE |
| F2:81202027 | C | T | COL22A1 | ENSFCA00000040466 | ENSFCAT00000056098 | missense variant                         | MODERATE |
| F2:82973708 | T | C | SLC45A4 | ENSFCA00000010846 | ENSFCAT00000010851 | missense variant                         | MODERATE |
| F2:83794075 | C | T | TSNARE1 | ENSFCA00000010752 | ENSFCAT00000010755 | missense variant                         | MODERATE |
|             |   |   |         |                   | ENSFCAT00000043081 | missense variant                         | MODERATE |
| X:10709501  | C | T | OFD1    | ENSFCA00000014870 | ENSFCAT00000014879 | missense variant                         | MODERATE |
|             |   |   |         |                   | ENSFCAT00000042140 | missense variant                         | MODERATE |
|             |   |   |         |                   | ENSFCAT00000062574 | missense variant                         | MODERATE |
| X:10709512  | G | T | OFD1    | ENSFCA00000014870 | ENSFCAT00000014879 | missense variant                         | MODERATE |
|             |   |   |         |                   | ENSFCAT00000042140 | missense variant                         | MODERATE |
|             |   |   |         |                   | ENSFCAT00000062574 | missense variant                         | MODERATE |
| X:26130933  | A | G | NR0B1   | ENSFCA00000026851 | ENSFCAT00000023728 | missense variant                         | MODERATE |
| X:39321509  | T | C | EFHC2   | ENSFCA00000007765 | ENSFCAT00000007767 | missense variant                         | MODERATE |
| X:104748999 | G | C | TENM1   | ENSFCA00000008355 | ENSFCAT00000008357 | missense variant                         | MODERATE |
|             |   |   |         |                   | ENSFCAT00000046755 | missense variant                         | MODERATE |
|             |   |   |         |                   | ENSFCAT00000066641 | missense variant                         | MODERATE |

Table 2. A list of variants unique to the proband that were called moderate impact by VEP and the effect in all associated transcripts.
